# Supplementary material
Source: PubMed Central journal article supplement (PMC5561548)
Supplement: NIHMS877095-supplement-Appendix.pdf [file NIHMS877095-supplement-Appendix.pdf]

## Appendix

### Contents:

1. **Appendix Exhibit A1 (comment)**
2. **Appendix Exhibit A2 (table):** Characteristics by Site of Care
3. **Appendix Exhibit A3 (figure):** Patient Experience by Race  
(Overall, unadjusted)
4. **Appendix Exhibit A4 (table):** Patient Experience by Race, Expanded  
Table
5. **Appendix Exhibit A5 (table):** Overall Patient Experience by Site  
of Care
6. **Appendix Exhibit A6 (table):** The Relationship between Health  
Status and Patient Experience for Black and White Patients
7. **Appendix Exhibit A7 (table):** Patient Experience by Site of Care

## **Appendix Exhibit A1.**

We believe that it is critically important to understand the experiences of all minority groups. However, in this study, we limited our focus to understanding the differences between blacks and whites for a number of methodological reasons. First, as prior work suggests, "black-serving" hospitals are quite different from those that disproportionately serve other minority groups. Therefore, our variable of "minority-serving" hospitals is constructed by examining the proportion of black patients only. In order to examine the experiences of other minority groups, it would necessitate creating several different hospital comparator groups each analyzed separately using different models and multiple interaction terms. We are pursuing separate studies to examine the experience of Hispanic patients with non-Hispanics and also other minority groups.

**Appendix Exhibit A2.** Characteristics by Site of Care

| <b>Characteristics</b>          | <b>Minority Serving Hospitals</b> | <b>Non-Minority Serving Hospitals</b> |
|---------------------------------|-----------------------------------|---------------------------------------|
| <b>Patient Characteristics</b>  |                                   |                                       |
| <b>No. of Patients</b>          | 394,211                           | 3,970,964                             |
| <b>Age</b>                      | (%)                               | (%)                                   |
| < 65                            | 58.4                              | 49.1                                  |
| 65 - 69                         | 10.2                              | 11.0                                  |
| 70 - 79                         | 18.0                              | 21.6                                  |
| 80 +                            | 13.4                              | 18.0                                  |
| <b>Gender</b>                   |                                   |                                       |
| Female                          | 63.1                              | 62.1                                  |
| <b>Race</b>                     |                                   |                                       |
| Non-Hispanic White              | 52.4                              | 88.2                                  |
| Black                           | 41.2                              | 6.4                                   |
| <b>Education</b>                |                                   |                                       |
| Less than high school           | 21.8                              | 15.1                                  |
| High school graduate or GED     | 32.2                              | 32.8                                  |
| Some college or beyond          | 45.9                              | 62.2                                  |
| <b>Overall Health</b>           |                                   |                                       |
| Excellent                       | 12.4                              | 13.0                                  |
| Very good or good               | 55.4                              | 58.1                                  |
| Fair or Poor                    | 32.2                              | 28.8                                  |
| <b>Reason of Admission</b>      |                                   |                                       |
| Maternity Care                  | 9.8                               | 11.7                                  |
| Medical                         | 57.5                              | 52.3                                  |
| Surgical                        | 32.6                              | 36.0                                  |
| <b>Hospital Characteristics</b> |                                   |                                       |
| <b>No. of Hospitals</b>         | 364                               | 3432                                  |
| <b>Hospital Size</b>            | (%)                               | (%)                                   |
| Small                           | 10.2                              | 20.7                                  |
| Medium                          | 53.7                              | 55.9                                  |
| Large                           | 36.1                              | 23.4                                  |
| <b>Teaching Status</b>          |                                   |                                       |
| Major Teaching                  | 34.8                              | 13.3                                  |
| Non-Major teaching              | 65.2                              | 86.7                                  |

SOURCE: Author analysis of HCAHPS Data, 2009-2010. Differences between minority-serving and non-minority serving hospitals were all statistically significant with  $p < 0.001$  for all characteristics.

**Note:** Some of the percentages do not add up to 100% due to rounding.

**Appendix Exhibit A3.** Patient Experience by Race (Overall, unadjusted)

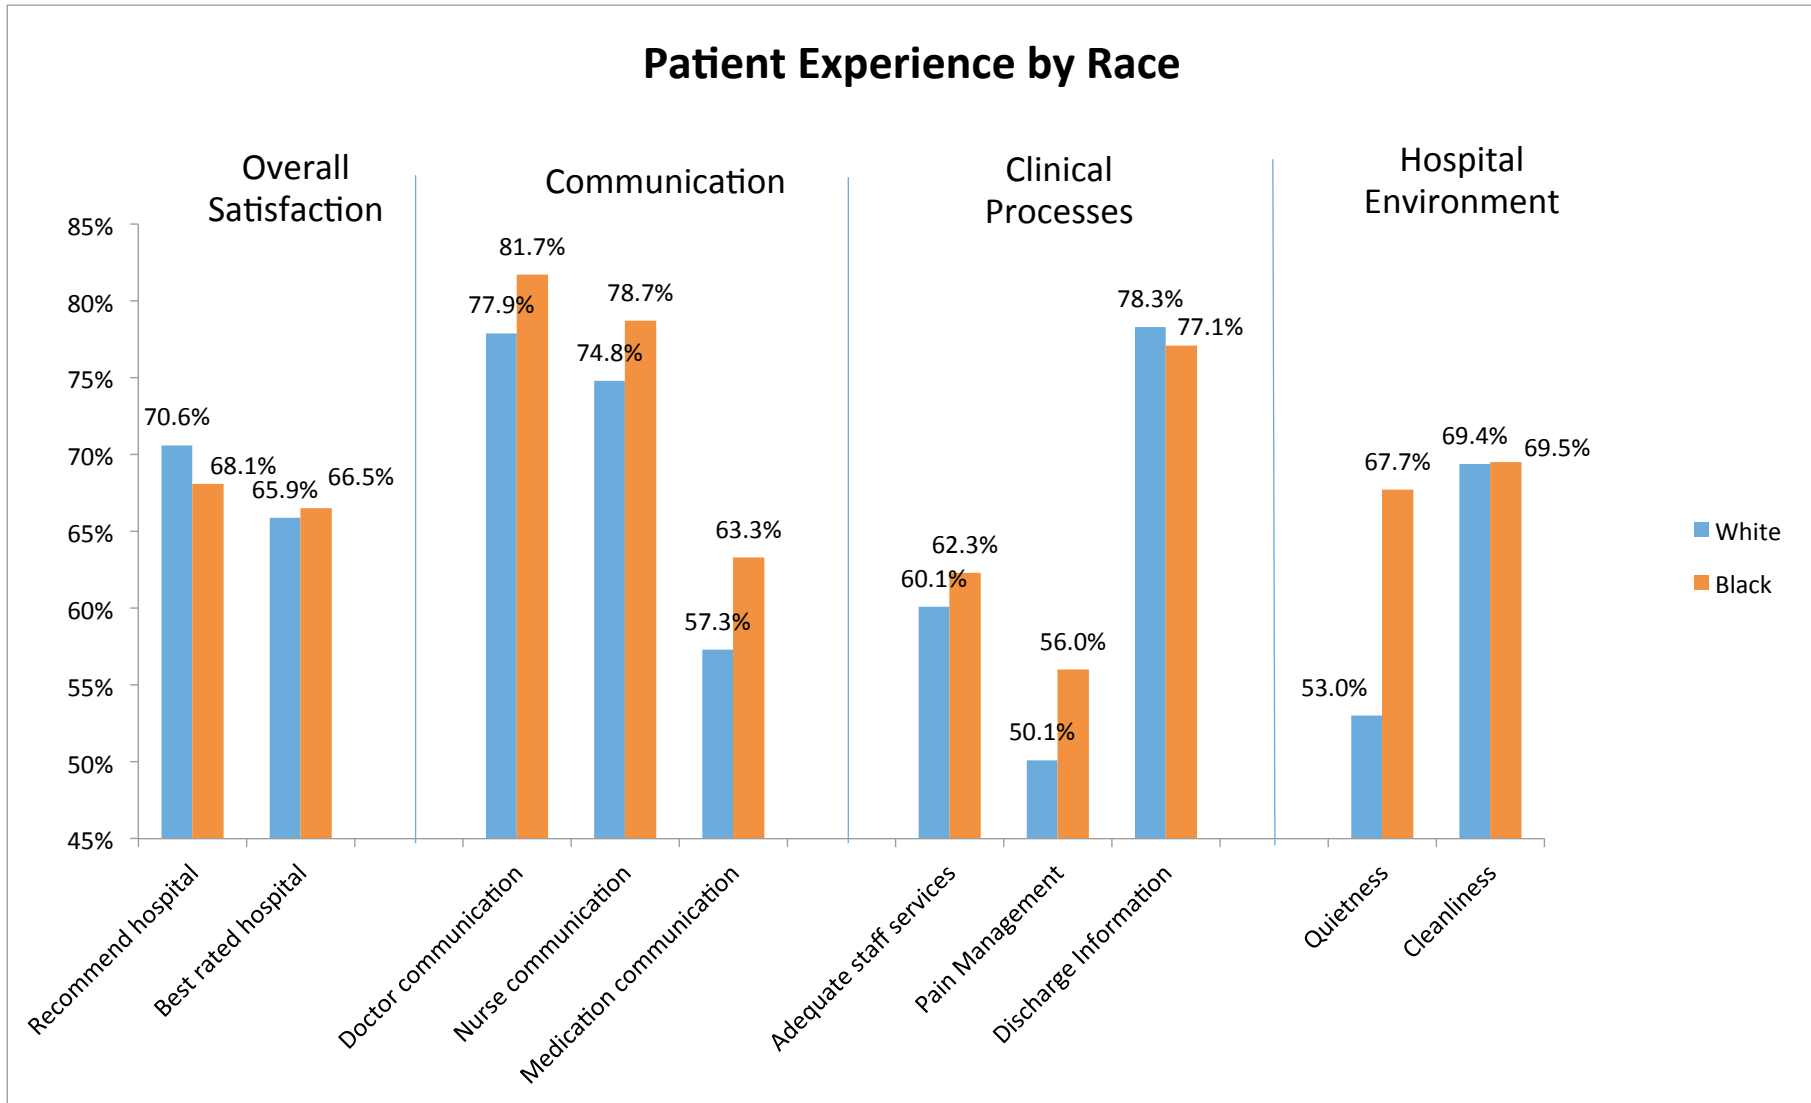

SOURCE: Author analysis of HCAHPS Data, 2009-2010.

**Caption:** Patient Experience by race, unadjusted. The difference in performance score between blacks and whites was statistically significant for all measures ( $p < 0.001$ ) except for two measures of patient satisfaction: best rated hospital and cleanliness of hospital environment ( $p = 0.37$  and  $p = 0.68$ , respectively).

**Appendix Exhibit A4:** Patient Experience by Race (Expanded version of Exhibit 3)

| HCAHPS Measure                      | Race       |       |          |         | Race                                |       |          |         | Race                                  |       |          |         | Between Hospital Difference |
|-------------------------------------|------------|-------|----------|---------|-------------------------------------|-------|----------|---------|---------------------------------------|-------|----------|---------|-----------------------------|
|                                     | Black      | White | Diff B-W | P-value | Black                               | White | Diff B-W | P-value | Black                                 | White | Diff B-W | P-value |                             |
|                                     | Unadjusted |       |          |         | Adjusted by Patient Characteristics |       |          |         | Adjusted by Pt + Hosp Characteristics |       |          |         |                             |
| <b>Overall Satisfaction</b>         |            |       |          |         |                                     |       |          |         |                                       |       |          |         |                             |
| Recommend hospital                  | 68.1%      | 70.6% | -2.5%    | <.0001  | 68.7%                               | 70.5% | -1.9%    | <.0001  | 69.7%                                 | 68.9% | 0.8%     | <.0001  | -2.7%                       |
| Best rated hospital                 | 66.5%      | 65.9% | 0.6%     | 0.37    | 66.9%                               | 65.9% | 1.0%     | <.0001  | 69.2%                                 | 65.3% | 3.8%     | <.0001  | -2.8%                       |
| <b>Communication</b>                |            |       |          |         |                                     |       |          |         |                                       |       |          |         |                             |
| Communication with doctors          | 81.7%      | 77.9% | 3.8%     | <.0001  | 81.1%                               | 78.3% | 2.8%     | <.0001  | 82.7%                                 | 79.0% | 3.8%     | <.0001  | -1.0%                       |
| Communication with nurses           | 78.7%      | 74.8% | 3.9%     | <.0001  | 78.4%                               | 75.1% | 3.3%     | <.0001  | 80.9%                                 | 75.6% | 5.4%     | <.0001  | -2.1%                       |
| Communication about medications     | 63.3%      | 57.3% | 6.0%     | <.0001  | 61.8%                               | 57.9% | 3.9%     | <.0001  | 64.2%                                 | 58.8% | 5.4%     | <.0001  | -1.5%                       |
| <b>Clinical Management</b>          |            |       |          |         |                                     |       |          |         |                                       |       |          |         |                             |
| Adequate staff services             | 62.3%      | 60.1% | 2.2%     | <.0001  | 61.0%                               | 60.7% | 0.3%     | 0.01    | 65.2%                                 | 62.3% | 2.9%     | <.0001  | -2.5%                       |
| Pain Management                     | 56.0%      | 50.1% | 6.0%     | <.0001  | 53.2%                               | 51.0% | 2.2%     | <.0001  | 54.7%                                 | 50.4% | 4.3%     | <.0001  | -2.1%                       |
| Discharge Information               | 77.1%      | 78.3% | -1.2%    | <.0001  | 76.3%                               | 78.7% | -2.3%    | <.0001  | 77.2%                                 | 77.7% | -0.5%    | <.0001  | -1.9%                       |
| <b>Hospital environment</b>         |            |       |          |         |                                     |       |          |         |                                       |       |          |         |                             |
| Quietness of hospital environment   | 69.6%      | 53.0% | 16.6%    | <.0001  | 67.7%                               | 53.9% | 13.8%    | <.0001  | 70.2%                                 | 56.2% | 13.9%    | <.0001  | -0.1%                       |
| Cleanliness of hospital environment | 69.5%      | 69.4% | 0.1%     | 0.68    | 69.4%                               | 69.5% | 0.1%     | 0.7980  | 73.9%                                 | 71.1% | 2.8%     | <.0001  | -2.9%                       |

SOURCE: Author analysis of HCAHPS Data, 2009-2010. Note: This table is the expanded version of Exhibit 3 (includes actual satisfaction scores and not just differences).

**Appendix Exhibit A5.** Overall Patient Experience by Site of Care

| <b>HCAHPS Measure</b>       | <b>Minority-Serving Hospitals</b> | <b>Non-Minority Serving Hospital</b> | <b>Difference</b> | <b>P-value</b> |
|-----------------------------|-----------------------------------|--------------------------------------|-------------------|----------------|
| <b>Overall Satisfaction</b> |                                   |                                      |                   |                |
| Recommend Hospital          | 67.2%                             | 71.7%                                | -4.5%             | <0.001         |
| Best Rated Hospital         | 64.5%                             | 67.2%                                | -2.7%             | <0.001         |
| <b>Communication</b>        |                                   |                                      |                   |                |
| Doctor communication        | 79.8%                             | 78.5%                                | +1.3%             | <0.001         |
| Nurse communication         | 75.0%                             | 75.4%                                | -0.4%             | 0.349          |
| Medication communication    | 58.7%                             | 58.3%                                | 0.4%              | 0.284          |
| <b>Clinical Processes</b>   |                                   |                                      |                   |                |
| Staff Responsiveness        | 59.5%                             | 60.7%                                | -1.2%             | 0.051          |
| Pain Control                | 51.1%                             | 51.3%                                | -0.2%             | 0.563          |
| Discharge Process           | 76.4%                             | 78.8%                                | -2.4%             | <0.001         |
| <b>Hospital environment</b> |                                   |                                      |                   |                |
| Quietness                   | 59.4%                             | 54.9%                                | 5.5%              | <0.001         |
| Cleanliness                 | 68.0%                             | 70.0%                                | -2.0%             | <0.001         |

SOURCE: Author analysis of HCAHPS Data, 2009-2010.

Note: Multivariable model adjusted for age, sex, overall health, education, type and source of admission, hospital size, teaching status, and controlled for clustering effect within hospitals.

Note: Values rounded to one decimal point and thus explains why some differences may seem off by 0.1%

**Appendix Exhibit A6.** The relationship between Health Status and Patient Experience for black and white patients

| HCAHPS Measure              | Fair or Poor Health Status |        |                                     | Good or Excellent Health Status |        |                                     | Interaction Between Health Status and Race (P-value) <sup>c</sup> |
|-----------------------------|----------------------------|--------|-------------------------------------|---------------------------------|--------|-------------------------------------|-------------------------------------------------------------------|
|                             | Blacks                     | Whites | Difference Black-White <sup>a</sup> | Blacks                          | Whites | Difference Black-White <sup>b</sup> |                                                                   |
| <b>Overall Satisfaction</b> |                            |        |                                     |                                 |        |                                     |                                                                   |
| Recommend Hospital          | 62.5%                      | 62.7%  | -0.2%                               | 73.4%                           | 71.5%  | +1.8%****                           | <0.001                                                            |
| Best Rated Hospital         | 62.4%                      | 58.6%  | +3.8%****                           | 73.4%                           | 68.2%  | +5.2%****                           | <0.001                                                            |
| <b>Communication</b>        |                            |        |                                     |                                 |        |                                     |                                                                   |
| Doctor communication        | 76.7%                      | 72.0%  | +4.7%****                           | 85.9%                           | 81.9%  | +4.0%****                           | <0.001                                                            |
| Nurse communication         | 74.7%                      | 69.7%  | +5.0%****                           | 84.4%                           | 78.1%  | +6.3%****                           | <0.001                                                            |
| Medication communication    | 58.5%                      | 53.1%  | +5.4%****                           | 67.6%                           | 61.1%  | +6.5%****                           | 0.693                                                             |
| <b>Clinical Processes</b>   |                            |        |                                     |                                 |        |                                     |                                                                   |
| Staff Responsiveness        | 57.6%                      | 54.0%  | +3.6%****                           | 69.6%                           | 66.0%  | +3.6%****                           | 0.78                                                              |
| Pain Control                | 49.0%                      | 44.0%  | +5.1%****                           | 58.0%                           | 53.1%  | +4.8%****                           | 0.16                                                              |
| Discharge Process           | 74.3%                      | 75.7%  | -1.4%****                           | 78.7%                           | 78.5%  | +0.2%**                             | <0.001                                                            |
| <b>Hospital environment</b> |                            |        |                                     |                                 |        |                                     |                                                                   |
| Quietness                   | 66.7%                      | 52.5%  | +14.3%****                          | 73.4%                           | 57.9%  | +15.5%****                          | <0.001                                                            |
| Cleanliness                 | 69.9%                      | 67.4%  | +2.5%****                           | 76.7%                           | 72.7%  | +4.0%****                           | <0.001                                                            |

SOURCE: Author analysis of HCAHPS Data, 2009-2010.

<sup>a</sup> Represents the adjusted difference between Blacks Satisfaction Scores minus Whites Satisfaction Scores in patients who self-reported fair or poor health status.

<sup>b</sup> Represents the adjusted difference between Blacks' Satisfaction Scores minus Whites' Satisfaction Scores in patients who self-reported good or excellent health status.

<sup>c</sup> Test for interaction between level of education and race.

\*\*\*\* P-value <0.0001

\*\* P-value <0.01

Note: Values rounded to one decimal point and thus explains why some differences may seem off by 0.1-0.2%.

**Appendix Exhibit A7.** Patient Experience by Site of Care

| HCAHPS Measure              | Minority Serving Hospitals |        |                                     | Non-Minority Serving Hospitals |        |                                     | Difference Across Hospitals By Race |                        |                                    |
|-----------------------------|----------------------------|--------|-------------------------------------|--------------------------------|--------|-------------------------------------|-------------------------------------|------------------------|------------------------------------|
|                             | Blacks                     | Whites | Difference Black-White <sup>a</sup> | Blacks                         | Whites | Difference Black-White <sup>b</sup> | By Blacks <sup>c</sup>              | By Whites <sup>d</sup> | P-value (interaction) <sup>e</sup> |
| <b>Overall Satisfaction</b> |                            |        |                                     |                                |        |                                     |                                     |                        |                                    |
| Recommend Hospital          | 66.1%                      | 68.0%  | -1.9%*                              | 73.1%                          | 71.6%  | +1.5%                               | -7.0%*                              | -3.6%*                 | <0.001                             |
| Best Rated Hospital         | 65.2%                      | 64.2%  | +1.0%                               | 71.1%                          | 67.0%  | +4.2%*                              | -5.9%*                              | -2.8%*                 | <0.001                             |
| <b>Communication</b>        |                            |        |                                     |                                |        |                                     |                                     |                        |                                    |
| Doctor communication        | 81.8%                      | 78.6%  | +3.3%*                              | 82.7%                          | 78.2%  | +4.5%*                              | -0.9%                               | +0.4%                  | <.001                              |
| Nurse communication         | 77.3%                      | 73.5%  | +3.8%*                              | 79.9%                          | 75.1%  | +4.8%*                              | -2.6%*                              | -1.6%                  | 0.013                              |
| Medication communication    | 61.7%                      | 57.0%  | +4.7%*                              | 63.4%                          | 57.9%  | +5.4%*                              | -1.7%*                              | -0.9%                  | 0.060                              |
| <b>Clinical Processes</b>   |                            |        |                                     |                                |        |                                     |                                     |                        |                                    |
| Staff Responsiveness        | 60.8%                      | 58.7%  | +2.2%*                              | 63.3%                          | 60.6%  | +2.7%*                              | -2.5%*                              | +1.9%*                 | 0.309                              |
| Pain Control                | 53.6%                      | 49.5%  | +4.1%*                              | 56.7%                          | 50.9%  | +5.8%*                              | -3.1%*                              | +1.4%*                 | <0.001                             |
| Discharge Process           | 75.8%                      | 76.8%  | -1.0%*                              | 76.4%                          | 78.8%  | -2.4%*                              | -0.6%                               | -2.0%*                 | 0.010                              |
| <b>Hospital environment</b> |                            |        |                                     |                                |        |                                     |                                     |                        |                                    |
| Quietness                   | 69.2%                      | 54.9%  | +14.3%*                             | 70.3%                          | 53.9%  | +16.4%*                             | -1.1%                               | +1.0%                  | 0.002                              |
| Cleanliness                 | 70.1%                      | 66.6%  | +3.5%*                              | 71.5%                          | 69.9%  | +1.6%*                              | -1.4%                               | -3.3%*                 | <0.001                             |

SOURCE: Author analysis of HCAHPS Data, 2009-2010.

Multivariable model adjusted for age, sex, overall health, education, type and source of admission, hospital size, teaching status, and controlled for clustering effect within hospitals.

<sup>a</sup> Represents the adjusted difference between Blacks Satisfaction Scores Minus Whites Satisfaction Scores in Minority Serving Hospitals only.

<sup>b</sup> Represents the adjusted difference between Blacks Satisfaction Scores Minus Whites Satisfaction Scores in Non-Minority Serving Hospitals only.

<sup>c</sup> Represents the adjusted difference between Blacks' Satisfaction Scores at Minority Serving Hospitals minus the Whites' Satisfaction Scores in Non-Minority Serving Hospitals.

<sup>d</sup> Represents the adjusted difference between Whites' Satisfaction Scores at Minority Serving Hospitals minus the Whites' Satisfaction Scores in Non-Minority Serving Hospitals.

<sup>e</sup> Test for interaction between site of care and the racial difference in patient experience between blacks and whites.

\*P-value <0.001

Note: Values rounded to one decimal point and thus explains why some differences may seem off by 0.1%.
